# Supplementary material for: Perceptions of Quality of Interprofessional Collaboration, Staff Well-Being and Nonbeneficial Treatment: A Comparison between Nurses and Physicians in Intensive and Palliative Care
Source: MDPI journal article supplement (doi:10.3390/healthcare12060602), 2024-03-07
Supplement: s1 [file s1]

**Online Supplement: Perceptions of quality of interprofessional collaboration, staff well-being and nonbeneficial treatment: A comparison between nurses and physicians in intensive and palliative care**

**Supplemental Figures**

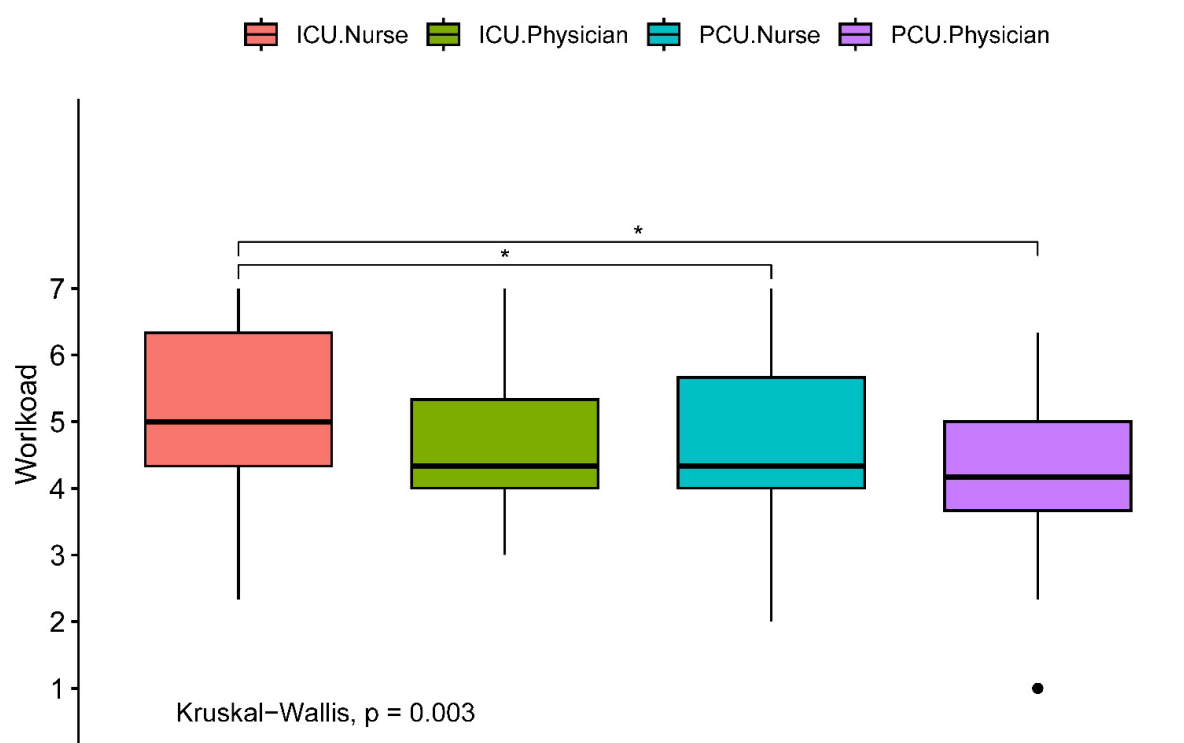

**Figure S1.** Comparison of perceived workload between intensive care and palliative care nurses and physicians. Tests of differences between groups were performed using the Kruskal-Wallis test. Comparisons between individual groups were performed using Wilcoxon rank sum tests adjusted for multiple comparisons by the Holm method (significance level: \*\*\*\*  $p \leq 0.0001$ , \*\*\*  $p \leq 0.001$ , \*\*  $p \leq 0.01$ , \*  $p \leq 0.05$ , no parenthesis: not significant).

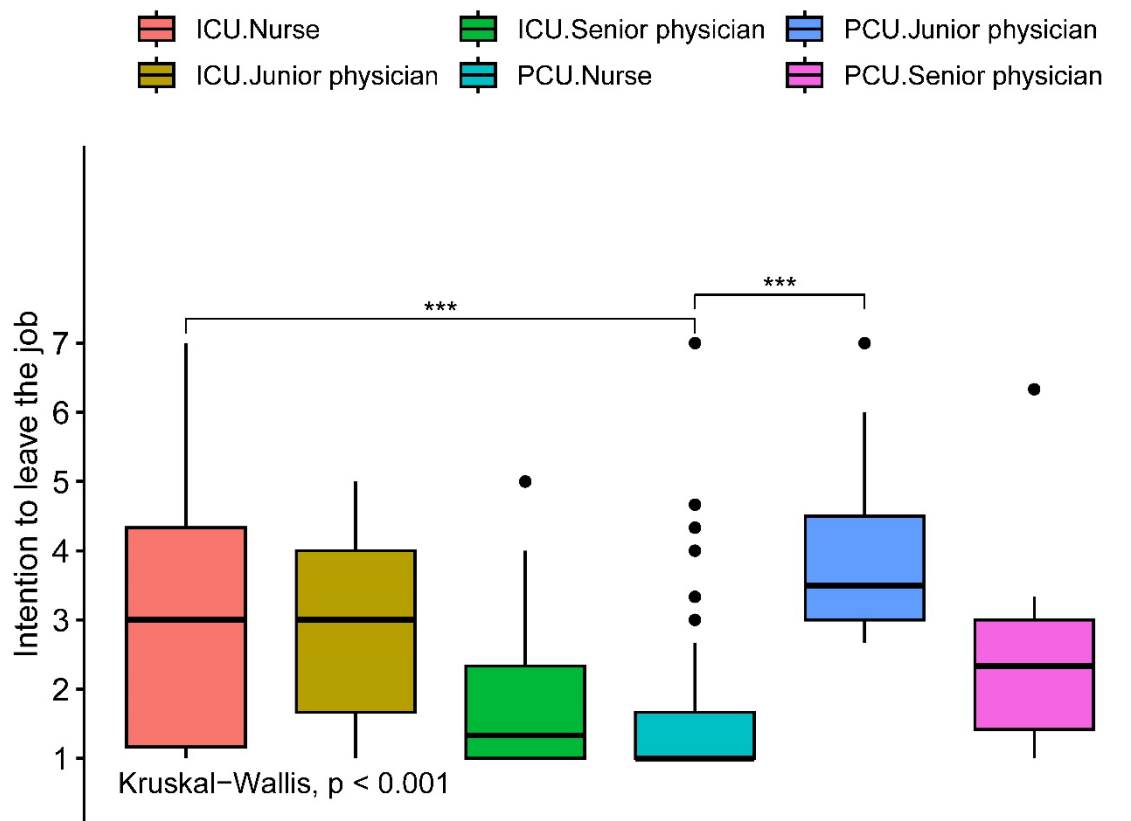

**Figure S2.** Comparison of intention to leave the job between intensive care and palliative care nurses, junior, and senior physicians. Tests of differences between groups were performed using the Kruskal-Wallis test. Comparisons between individual groups were performed using Wilcoxon rank sum tests adjusted for multiple comparisons by the Holm method (significance level: \*\*\*\*  $p \leq 0.0001$ , \*\*\*  $p \leq 0.001$ , \*\*  $p \leq 0.01$ , \*  $p \leq 0.05$ , no parenthesis: not significant).

## Supplemental Tables

**Table S1.** Items of the questionnaire

|                                                                                            | Intensive<br>care, <i>n</i> = 72 | Palliative<br>care, <i>n</i> = 72 | P<br>value | Cronbach's alpha<br>intensive care | Cronbach's alpha<br>palliative care |
|--------------------------------------------------------------------------------------------|----------------------------------|-----------------------------------|------------|------------------------------------|-------------------------------------|
| <b>Workload</b> (1:totally disagree – 7:totally agree)                                     |                                  |                                   |            | 0.82                               | 0.74                                |
| I have to work very hard.                                                                  | 6 [4, 6]                         | 5 [4, 6]                          | 0.075      |                                    |                                     |
| I am asked to do an excessive amount of work.                                              | 5 [4, 6]                         | 4 [3.75, 5]                       | 0.007      |                                    |                                     |
| I don't have enough time to get my work done.                                              | 5 [4, 6]                         | 4 [4, 5]                          | 0.025      |                                    |                                     |
| <b>Overall quality of collaboration</b> (1:very low – 5:very high)                         |                                  |                                   |            | 0.81                               | 0.73                                |
| Describe the quality of collaboration and communication you have experienced with...Nurses | 4 [3, 4]                         | 4 [4, 5]                          | ≤0.001     |                                    |                                     |
| ...Head Nurse                                                                              | 3 [2, 4]                         | 5 [4, 5]                          | ≤0.001     |                                    |                                     |
| ...Residents                                                                               | 4 [3, 4]                         | 4 [3, 4]                          | 0.135      |                                    |                                     |
| ...Attendings                                                                              | 4 [3, 4]                         | 4 [3, 5]                          | 0.027      |                                    |                                     |
| ...Consultant Physicians                                                                   | 3 [2, 4]                         | 3 [2.75, 4]                       | 0.833      |                                    |                                     |
| ...Occupational/Physio-therapists                                                          | 4 [3, 4]                         | 4 [4, 5]                          | 0.002      |                                    |                                     |

|                                                                                                  |             |             |        |      |      |
|--------------------------------------------------------------------------------------------------|-------------|-------------|--------|------|------|
| ...Psychologists/Social Workers                                                                  | 3.5 [3, 4]  | 4 [4, 5]    | ≤0.001 |      |      |
| <b>Collaboration about Care Decisions</b> (1:totally disagree – 7:totally agree)                 |             |             |        | 0.91 | 0.88 |
| Nurses and physicians plan together to make decisions about care for patients.                   | 4 [3, 5]    | 6 [4, 6]    | ≤0.001 |      |      |
| Open communication between physicians and nurses takes place as decisions are made for patients. | 4 [3, 5]    | 6 [4.75, 6] | ≤0.001 |      |      |
| Physicians and nurses cooperate in making decisions regarding patient care.                      | 4 [3, 5]    | 6 [5, 6]    | ≤0.001 |      |      |
| In making decisions about patient care, both nursing and medical concerns are considered.        | 4 [3.75, 5] | 6 [5, 6]    | ≤0.001 |      |      |
| <b>Inclusive leadership by attendings</b> (1:totally disagree – 7:totally agree)                 |             |             |        | 0.92 | 0.94 |
| Attending physicians of this unit encourage residents to take initiative in patient care.        | 5 [4, 6]    | 6 [4, 7]    | 0.002  |      |      |
| Attending physicians of this unit ask residents for input.                                       | 4 [4, 6]    | 6 [4, 6]    | 0.004  |      |      |
| Attending physicians of this unit do not value opinions of residents equally.                    | 4 [4, 6]    | 6 [4, 6]    | 0.003  |      |      |
| Attending physicians of this unit are open to discuss differing opinions with residents.         | 4 [3, 6]    | 6 [4, 6]    | 0.007  |      |      |
| <b>Inclusive leadership by head nurse</b> (1:totally disagree – 7:totally agree)                 |             |             |        |      |      |

|                                                                                                                                       |            |                   |      |      |
|---------------------------------------------------------------------------------------------------------------------------------------|------------|-------------------|------|------|
| The head nurse of this unit encourages nurses to take initiative in patient care.                                                     | 4.5 [3, 6] | 6 [6, 7] ≤0.001   | 0.91 | 0.9  |
| The head nurse of this unit asks nurses for input.                                                                                    | 4 [3, 6]   | 6 [6, 7] ≤0.001   |      |      |
| The head nurse of this unit does not value opinions of nurses equally.                                                                | 4 [2, 6]   | 7 [6, 7] ≤0.001   |      |      |
| The head nurse of this unit is open to discuss differing opinions with nurses.                                                        | 4 [3, 6]   | 7 [6, 7] ≤0.001   |      |      |
| <b>Nonbeneficial treatment</b> (1:never – 6:very often)                                                                               |            |                   | 0.93 | 0.92 |
| For the patients you treat on your unit how often do you perceive that...a fatally ill patient receives unnecessary diagnostic tests. | 4 [4, 5]   | 4 [2, 4.5] ≤0.001 |      |      |
| ...a patient receives too much life-sustaining treatment given his prognosis.                                                         | 5 [4, 5]   | 3.5 [2, 4] ≤0.001 |      |      |
| ...continued life-sustaining treatment unnecessarily prolongs the suffering of a patient.                                             | 5 [4, 5]   | 3 [2, 4] ≤0.001   |      |      |
| ...intensive resuscitation is done on a patient that only delays that patients' near death.                                           | 4 [3, 5]   | 1 [1, 2] ≤0.001   |      |      |
| ...decisions for limiting life-sustaining treatments are unnecessarily delayed.                                                       | 4 [4, 5]   | 3 [2, 4] ≤0.001   |      |      |
| <b>Emotional exhaustion</b> (1:never – 6:very often)                                                                                  |            |                   | 0.9  | 0.88 |
| I feel burned out from my work.                                                                                                       | 4 [3, 4]   | 4 [3, 4] 0.433    |      |      |

|                                                                                       |            |            |       |      |      |
|---------------------------------------------------------------------------------------|------------|------------|-------|------|------|
| I feel emotionally drained from my work.                                              | 3.5 [3, 4] | 4 [2.5, 4] | 0.493 |      |      |
| I feel fatigued when I get up in the morning and have to face another day on the job. | 3 [2, 4]   | 4 [3, 4]   | 0.933 |      |      |
| Working a whole shift is really a strain for me                                       | 3 [2, 4]   | 3 [2, 4]   | 0.277 |      |      |
| I feel used up at the end of the workday.                                             | 4 [3, 5]   | 4 [3, 4]   | 0.09  |      |      |
| <b>Intention to leave the job</b> (1:totally disagree – 7:totally agree)              |            |            |       | 0.79 | 0.81 |
| I plan on leaving my job within the next year.                                        | 1 [1, 4]   | 1 [1, 2]   | 0.117 |      |      |
| I have been actively looking for other jobs.                                          | 1 [1, 4]   | 1 [1, 2]   | 0.036 |      |      |
| I want to remain in my job.                                                           | 5.5 [4, 7] | 7 [5, 7]   | 0.009 |      |      |

Descriptive statistics given as *median* [*1<sup>st</sup> quartile*, *3<sup>rd</sup> quartile*]. Significance testing by Wilcoxon rank sum test.

**Table S2.** Characteristics of hospitals and units

|                                                      | <b>Hospital A</b> | <b>Hospital B</b>   | <b>Hospital C</b>   | <b>Hospital D</b>                               | <b>Hospital E</b>   | <b>Hospital F</b> |
|------------------------------------------------------|-------------------|---------------------|---------------------|-------------------------------------------------|---------------------|-------------------|
| <b>Hospital</b>                                      |                   |                     |                     |                                                 |                     |                   |
| Level of care                                        | Primary care      | University hospital | University hospital | Primary care                                    | University hospital | Primary care      |
| Hospital beds ( <i>n</i> )                           | 429               | 800                 | 1324                | 330                                             | 1350                | 186               |
| <b>Intensive care unit</b>                           |                   |                     |                     |                                                 |                     |                   |
| Type of unit                                         | Mixed             | Surgical            | Surgical            | Mixed                                           | Surgical            | Mixed             |
| Medical leadership                                   | Anesthesiology    | Anesthesiology      | Anesthesiology      | Anesthesiology & Internal medicine (cardiology) | Anesthesiology      | Anesthesiology    |
| Beds ( <i>n</i> )                                    | 10                | 25                  | 50                  | 10                                              | 58                  | 7                 |
| Physicians ( <i>n</i> )                              | 12                | 52                  | 55                  | 13                                              | 44                  | 5                 |
| Nurses ( <i>n</i> )                                  | 31                | 93                  | 178                 | 49                                              | 165                 | 33                |
| Occupational/physiotherapists integrated in the team | Yes               | Yes                 | No                  | Yes                                             | No                  | No                |
| Psychologist integrated in the team                  | No                | No                  | Yes                 | No                                              | Yes                 | No                |

|                                                     |                              |                              |                                               |                              |                |                |
|-----------------------------------------------------|------------------------------|------------------------------|-----------------------------------------------|------------------------------|----------------|----------------|
| Social worker integrated in the team                | No                           | No                           | No                                            | No                           | No             | No             |
| <b>Palliative care unit</b>                         |                              |                              |                                               |                              |                |                |
| Medical leadership                                  | Internal medicine (oncology) | Internal medicine (oncology) | Anesthesiology & Internal medicine (oncology) | Internal medicine (oncology) | Anesthesiology | Anesthesiology |
| Beds (n)                                            | 10                           | 10                           | 10                                            | 12                           | 12             | 7              |
| Physicians ( <i>n</i> )                             | 2                            | 4                            | 13                                            | 2                            | 4              | 4              |
| Nurses ( <i>n</i> )                                 | 10                           | 10                           | 18                                            | 22                           | 15             | 9              |
| Occupational/physiotherapist integrated in the team | Yes                          | Yes                          | Yes                                           | Yes                          | Yes            | Yes            |
| Psychologist integrated in the team                 | Yes                          | Yes                          | Yes                                           | No                           | Yes            | No             |
| Social worker integrated in the team                | Yes                          | Yes                          | Yes                                           | Yes                          | Yes            | Yes            |



**Table S3.** Balance measured by standardized differences before and after matching.

|                                         | ITS, N<br>= 313 | Palli, N<br>= 79 | Standardized<br>difference | ITS, N<br>= 72 | Palli, N<br>= 72 | Standardized<br>difference |
|-----------------------------------------|-----------------|------------------|----------------------------|----------------|------------------|----------------------------|
| Hospital A                              | 29 (9.3)        | 9 (11.4)         | -0.07                      | 9 (12.5)       | 9 (12.5)         | 0                          |
| Hospital B                              | 21 (6.7)        | 9 (11.4)         | -0.16                      | 9 (12.5)       | 9 (12.5)         | 0                          |
| Hospital C                              | 117<br>(37.4)   | 23<br>(29.1)     | 0.18                       | 23<br>(31.9)   | 23<br>(31.9)     | 0                          |
| Hospital D                              | 36<br>(11.5)    | 19<br>(24.1)     | -0.33                      | 13<br>(18.1)   | 13<br>(18.1)     | 0                          |
| Hospital E                              | 96<br>(30.7)    | 9 (11.4)         | 0.49                       | 9 (12.5)       | 9 (12.5)         | 0                          |
| Hospital F                              | 14 (4.5)        | 10<br>(12.7)     | -0.3                       | 9 (12.5)       | 9 (12.5)         | 0                          |
| Job role                                |                 |                  |                            |                |                  |                            |
| Nurse                                   | 232<br>(74.1)   | 53<br>(67.1)     | 0.15                       | 50<br>(69.4)   | 49<br>(68.1)     | 0.03                       |
| Head nurse                              | 6 (1.9)         | 6 (7.6)          | -0.27                      | 3 (4.2)        | 3 (4.2)          | 0                          |
| Resident                                | 52<br>(16.6)    | 9 (11.4)         | 0.15                       | 8 (11.1)       | 9 (12.5)         | -0.04                      |
| Attending                               | 23 (7.3)        | 11<br>(13.9)     | -0.21                      | 11<br>(15.3)   | 11<br>(15.3)     | 0                          |
| Sex: Female                             | 209<br>(69.9)   | 55<br>(74.3)     | -0.1                       | 49 (71)        | 48<br>(71.6)     | -0.01                      |
| Age $\geq$ 40 years                     | 77<br>(25.9)    | 53<br>(73.6)     | 1.08                       | 45<br>(65.2)   | 46<br>(70.8)     | 0.12                       |
| Medical<br>experience $\geq$ 5<br>years | 189<br>(66.8)   | 65<br>(91.5)     | 0.64                       | 58<br>(90.6)   | 58<br>(90.6)     | 0                          |

Descriptive statistics given as *n* (%)
